# Supplementary material
Source: publisher site journal article supplement (https://www.dovepress.com/get_supplementary_file.php?f=301493.docx)
Supplement: Supplementary file 1 [file get_supplementary_file.php]

**Supplementary Table 1:** Sociodemographic and occupational characteristics by work schedule type, comparing all non-standard workers to the final sample analyzed.

|  | **Early mornings (pre 8am)** | | **Afternoons (3pm+)** | | **Evenings and nights** | | **Rotating** | |
| --- | --- | --- | --- | --- | --- | --- | --- | --- |
|  | Non-standard workers | Final sample | Non-standard workers | Final sample | Non-standard workers | Final sample | Non-standard workers | Final sample |
|  | *n=448* | *n*=392 | *n=448* | *n*=392 | *n=448* | *n*=392 | *n=448* | *n*=392 |
| Sex (female) | 89 [44.7] | 78 (43.8) | 89 [44.7] | 78 (43.8) | 29 [50.9] | 25 [53.2] | 62 [53.4] | 57 [54.8] |
| *Missing* | 0 | 0 | 0 | 0 | 0 | 0 | 0 | 0 |
| Age (years) |  |  |  |  |  |  |  |  |
| *18-24* | 23 [11.6] | 19 [10.7] | 18 [23.7] | 15 [23.8] | 10 [17.5] | 9 [19.1] | 23 [19.8] | 20 [19.2] |
| *25-34* | 37[18.6] | 34 [19.1] | 21 [27.6] | 17 [27.0] | 16 [28.1] | 11 [23.4] | 28 [24.1] | 27 [26.0] |
| *35-44* | 47 [23.6] | 43 [24.2] | 10 [13.2] | 7 [11.1] | 13 [22.8] | 11 [23.4] | 30 [25.9] | 26 [25.0] |
| *45-54* | 50 [25.1] | 45 [25.3] | 11 [14.5] | 9 [14.3] | 9 [15.8] | 8 [17.0] | 17 [14.7] | 14 [13.5] |
| *55+* | 42 [21.1] | 37 [20.8] | 16 [21.1] | 15 [23.8] | 9 [15.8] | 8 [17.0] | 18 [15.5] | 17 [16.3] |
| *Missing* | 0 | 0 | 0 | 0 | 0 | 0 | 0 | 0 |
| Gross family income |  |  |  |  |  |  |  |  |
| <$30,000 | 16 [9.0] | 13 [8.0] | 14 [21.5] | 9 [16.7] | 7 [12.7] | 7 [15.6] | 6 [5.9] | 6 [6.5] |
| $30001 - $50000 | 30 [16.9] | 27 [16.6] | 11 [16.9] | 10 [18.5] | 12 [21.8] | 9 [20.0] | 10 [9.9] | 9 [9.8] |
| $50001-$100000 | 73 [41.2] | 67 [41.1] | 29 [44.6] | 25 [46.3] | 20 [36.4] | 14 [31.1] | 43 [42.6] | 38 [41.3] |
| >$100000 | 58 [32.8] | 56 [34.4] | 11 [16.9] | 10 [18.5] | 16 [29.1] | 15 [33.3] | 42 [41.6] | 39 [42.4] |
| *Missing* | 22 | 15 | 11 | 9 | 2 | 2 | 15 | 12 |
| Financial strain |  |  |  |  |  |  |  |  |
| Save a bit / save a lot | 124 [63.6] | 112 [63.6] | 34 [47.9] | 30 [50] | 28 [50.9] | 23 [48.9] | 70 [61.9] | 62 [60.8] |
| Spend more than earn / get by | 71 [36.4] | 64 [36.4] | 37 [52.1] | 30 [50] | 27 [49.1] | 24 [51.1] | 43 [38.1] | 40 [39.2] |
| *Missing* | 4 | 2 | 5 | 3 | 2 | 0 | 3 | 2 |
| Work hours |  |  |  |  |  |  |  |  |
| *<35* | 67 [36.8] | 62 [36.7] | 47 [68.1] | 41 [71.9] | 29 [61.7] | 27 [65.9] | 46 [46.0] | 43 [47.8] |
| *35-40* | 77 [42.3] | 71 [42.0] | 18 [26.1] | 14 [24.6] | 14 [29.8] | 12 [29.3] | 32 [32.0] | 28 [31.1] |
| *41-48* | 18 [9.9] | 16 [9.5] | 3 [4.3] | 1 [1.8] | 2 [4.3] | 1 [2.4] | 12 [12.0] | 10 [11.1] |
| *>48* | 20 [11.0] | 20 [11.8] | 1 [1.4] | 1 [1.8] | 2 [4.3] | 1 [2.4] | 10 [10.0] | 9 [10.0] |
| *Missing* | 0 | 0 | 0 | 0 | 0 | 0 | 0 | 0 |
| Non-standard work burdena |  |  |  |  |  |  |  |  |
| One | 143 [71.9] | 128 [71.9] | 57 [75.0] | 48 [76.2] | 37 [64.9] | 31 [66.0] | 78 [67.2] | 69 [66.3] |
| Two or more | 56 [28.1] | 50 [28.1] | 19 [25.0] | 15 [23.8] | 20 [35.1] | 16 [34.0] | 38 [32.8] | 35 [33.7] |
| *Missing* | 0 | 0 | 0 | 0 | 0 | 0 | 0 | 0 |
| Level of activity |  |  |  |  |  |  |  |  |
| Almost none, none | 47 [24.0] | 45 [25.4] | 15 [19.7] | 12 [19.0] | 9 [16.1] | 8 [17.0] | 26 [22.6] | 25 [24.0] |
| All, almost all, some | 149 [76.0] | 132 [74.6] | 61 [80.3] | 51 [81.0] | 47 [83.9] | 39 [83.0] | 89 [77.4] | 79 [76.0] |
| *Missing* | 3 | 1 | 0 | 0 | 1 | 0 | 1 | 0 |
| Occupation (ANZSCO) |  |  |  |  |  |  |  |  |
| Professional/Managerial | 49 [25.8] | 45 [25.9] | 20 [27.4] | 17 [27.9] | 19 [35.2] | 14 [31.1] | 21 [19.1] | 21 [21.2] |
| Clerical | 29 [15.3] | 28 [16.1] | 8 [11.0] | 8 [13.1] | 6 [11.1] | 5 [11.1] | 11 [10.0] | 10 [10.1] |
| Technical/trade/labor | 56 [29.5] | 52 [29.9] | 8 [11.0] | 7 [11.5] | 6 [11.1] | 5 [11.1] | 20 [18.2] | 17 [17.2] |
| Other | 56 [29.5] | 49 [28.2] | 37 [50.7] | 29 [47.5] | 23 [42.6] | 21 [46.7] | 58 [52.7] | 51 [51.5] |
| *Missing* | 9 | 4 | 3 | 2 | 3 | 2 | 6 | 5 |
|  |  |  |  |  |  |  |  |  |
| Data are presented as n [percentage of available data] | | |  |  |  |  |  |  |
| a Non-standardwork burden consists of a combination of long hours, >1 job, or shift work in additional to non-standard work schedule | | | | | | | |  |
